# Supplementary material for: Fibroblast activation protein-α-adaptive micelles deliver anti-cancer drugs and reprogram stroma fibrosis
Source: Royal Society of Chemistry journal article supplement (doi:10.1039/d0nr04465b), 2020-01-01
Supplement: d0nr04465b1.pdf [file d0nr04465b1.pdf]

## Support Information

### **Fibroblast activation protein- $\alpha$ -adaptive micelle reprogram stroma fibrosis for promoted anti-cancer drug delivery**

Chao Teng <sup>a</sup>, Beiyuan Zhang <sup>a</sup>, Zhongyue Yuan<sup>a</sup>, Zheng Kuang<sup>a</sup>, Zhuodong Chai<sup>a</sup>, Lianjie Ren<sup>a,b</sup>,  
Chao Qin<sup>a</sup>, Lei Yang<sup>a</sup>, Xiaopeng Han <sup>a\*</sup> and Lifang Yin<sup>a\*</sup>

<sup>a</sup> School of Pharmacy, China Pharmaceutical University, Nanjing, 210009, PR China

<sup>b</sup> Center for Drug Evaluation, CFDA, Beijing, 100022, PR China

### **Corresponding Author**

Tel.: +86 2583271018; fax: +86 2583271018. E-mail address: nkxhp15@163.com (Xiaopeng Han)

Tel.: +86 2583271018; fax: +86 2583271018. E-mail address: lifangyin\_@163.com (Lifang Yin)

## Supplementary Figure Captions

**Scheme S1.** Synthesis of the FAP- $\alpha$ -sensitive pegylated Hyaluronic acid-Curcumin conjugate (PFHC).

**Scheme S2.** Synthesis of the non-FAP- $\alpha$ -sensitive pegylated Hyaluronic acid-Curcumin conjugate (PHC)(Ph= p-hydroxy-phenylalanine).

**Figure S1.**  $^1\text{H}$  NMR spectrum of Z-Ala-pro-gly(Z-ARG) in DMSO- $d_6$ .

**Figure S2.**  $^1\text{H}$  NMR spectrum of Ala-phe-gly(Z-AHG) in DMSO- $d_6$ .

**Figure S3.** Cleavage of Z-Ala-pro-gly after incubating with FAP $\alpha$  for 4 h. (A) 0h; (B) 4h.

**Figure S4.** Cleavage of Z-Ala-phe-gly after incubating with FAP $\alpha$  for 4 h. (A) 0h; (B) 4h.

**Figure S5.**  $^1\text{H}$  NMR spectrum of PFHC in  $\text{D}_2\text{O}$ .

**Figure S6.**  $^1\text{H}$  NMR spectrum of PFHC in  $\text{D}_2\text{O}$  after incubating with FAP $\alpha$  for 4 h.

**Figure S7.**  $^1\text{H}$  NMR spectrum of PHC in  $\text{D}_2\text{O}$  after incubating with FAP $\alpha$  for 4 h.

**Figure S8.** *In vitro* DOX release profiles of DOX/PFHC and DOX/PHC NPs in different conditions. Data are presented as mean  $\pm$  SD (n = 3).

**Figure S9.** The stability of nanopartilces formulations in 10 % plasma (A) and DMEM with 10% FBS(B) (Data are presented as mean  $\pm$  SD (n = 3)).

**Figure S10.** The relative expressing levels of  $\alpha$ -SMA in different cell lines with CLSM (bar=20  $\mu\text{m}$ ).

**Figure S11.** The relative expressing levels of FAP- $\alpha$  in in different cell lines with flow cytometry (a: control, b: NIH3T3 c: active NIH3T3).

**Figure S12.** The relative expressing levels of CD44 receptors in different cell lines. (A) Immunofluorescence staining analysis of CD44 receptors expression with CLSM (bar=100  $\mu$ m). (B) Analysis of CD44 receptors expression with flow cytometry. (C) Analysis of CD44 receptors expression with WB.

**Figure S13.** Representative CLSM images of 4T1 cell lines following 2 h incubation with different formulations (DOX dosage: 5.0  $\mu$ g/mL, bar=50  $\mu$ m).

**Figure S14.** Representative CLSM images of active NIH3T3 cell lines following 2 h incubation with different formulations (DOX dosage: 5.0  $\mu$ g/mL, bar=50  $\mu$ m).

**Figure S15.** The cytotoxicity of Dox+Cur against different cell lines for 24h. (A)NIH3T3, (B) 4T1, (C) active NIH3T3 cells (mean  $\pm$  SD,  $n = 3$ )(The concentration of free Cur was equal to that in DOX-loading nanoparticles with same DOX dosage).

**Figure S16.** (A-B)Ex vivo Dox fluorescence images of the major organs and tumor harvested from the 4T1-NIH3T3 bearing mice following different times intravenous injection of NPs (DOX:5mg/kg). (C)Quantitative analysis of relative organ and tumor accumulation at 8 h (\* $P \leq 0.05$ , indicates  $\pm$  SD,  $n = 3$ ).

**Figure S17.** Plasma concentration-time curves of DOX in rats after intravenous administration with different DOX formulations at a dose of 5 mg/kg DOX ( $n = 3$ , mean  $\pm$  SD).

**Figure S18.** Expression of FAP $\alpha$  by western blot in 4T1 tumor tissues (30 $\mu$ g of rhFAP $\alpha$  used as control).

**Figure S19.** H&E staining of major organs after the last treatment (bar= 50  $\mu$ m).

**Figure S20.** Morphological evaluations of tumor sites. (A) In situ cell death detection of tumor tissue (TUNEL);(B) *In vivo* evaluation of tumor proliferation level by Ki-67 immunohistochemistry (\*P≤0.05, \*\*P≤0.01, indicates ± SD, n = 3).

**Figure S21.** Semi-quantitative analysis of Masson staining and α-SMA by immunofluorescent staining ( \*P≤0.05, indicates ± SD, n = 3).

**Figure S22.** Micro-distribution of NPs in tumor mass after last treatment. (bar=20 μm)

**Figure S23.** Semi-quantitative analysis of TGF-beta and MCP-1 by immunofluorescent staining ( \*P≤0.05, indicates ± SD, n = 3).

**Table S1.** Characterizations of the micelles. (indicates ± SD, n = 3)

**Table S2.** Pharmacokinetic parameters of Dox and DOX-loading NPs in mice after a single intravenous administration at the dose of 5 mg/kg (*n* = 3).

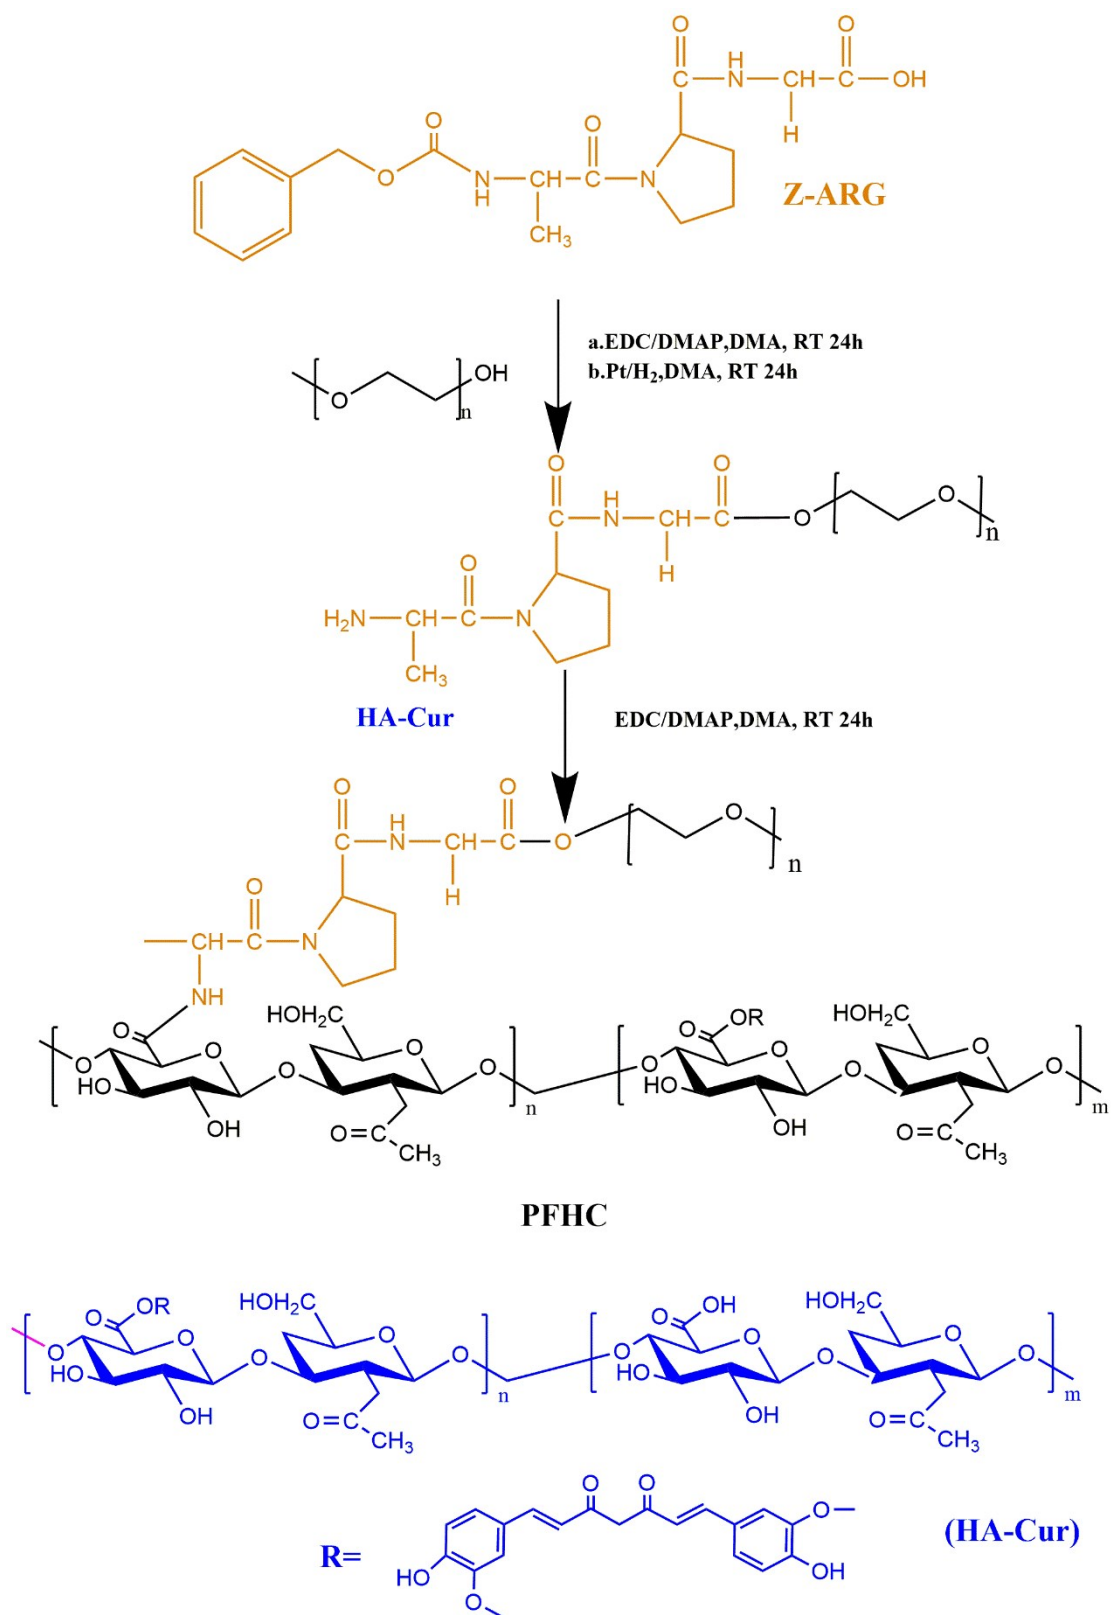

**Scheme S1.** Synthesis of the FAP- $\alpha$ -sensitive pegylated Hyaluronic acid-Curcumin conjugate (PFHC).

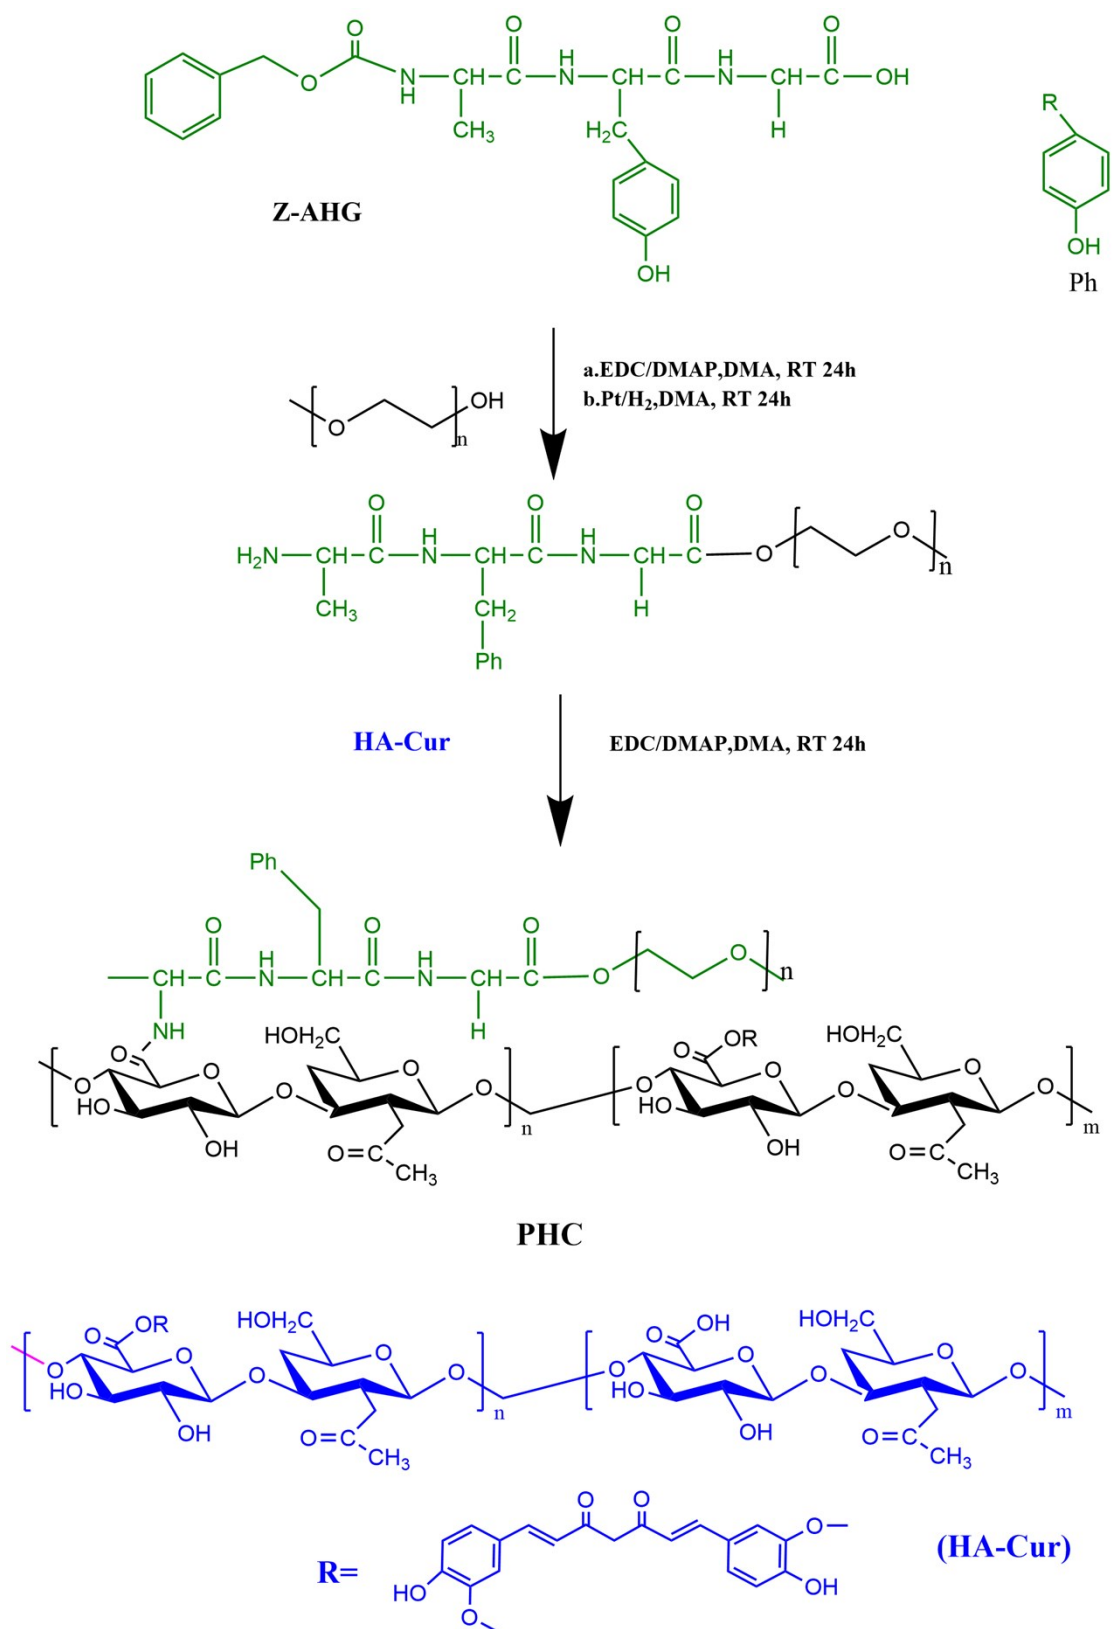

**Scheme S2.** Synthesis of the non-FAP- $\alpha$ -sensitive pegylated Hyaluronic acid-Curcumin conjugate (PHC)(Ph= p-hydroxy-phenylalanine).

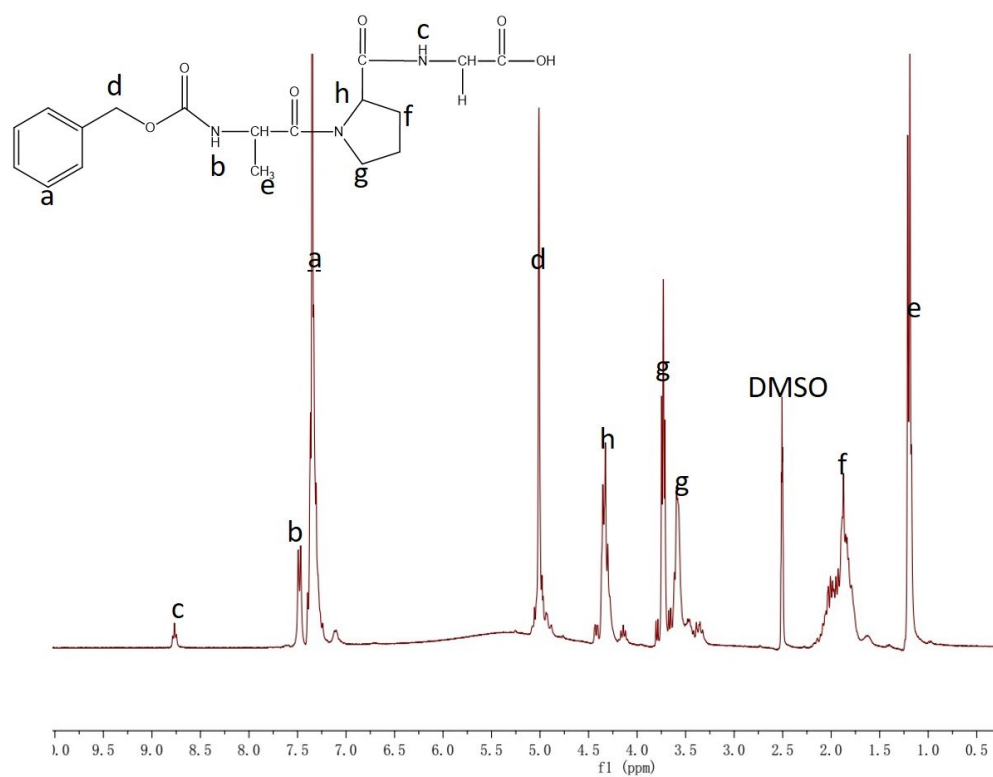

**Figure S1.** <sup>1</sup>H NMR spectrum of Z-Ala-pro-gly(Z-ARG) in DMSO-d<sub>6</sub>.

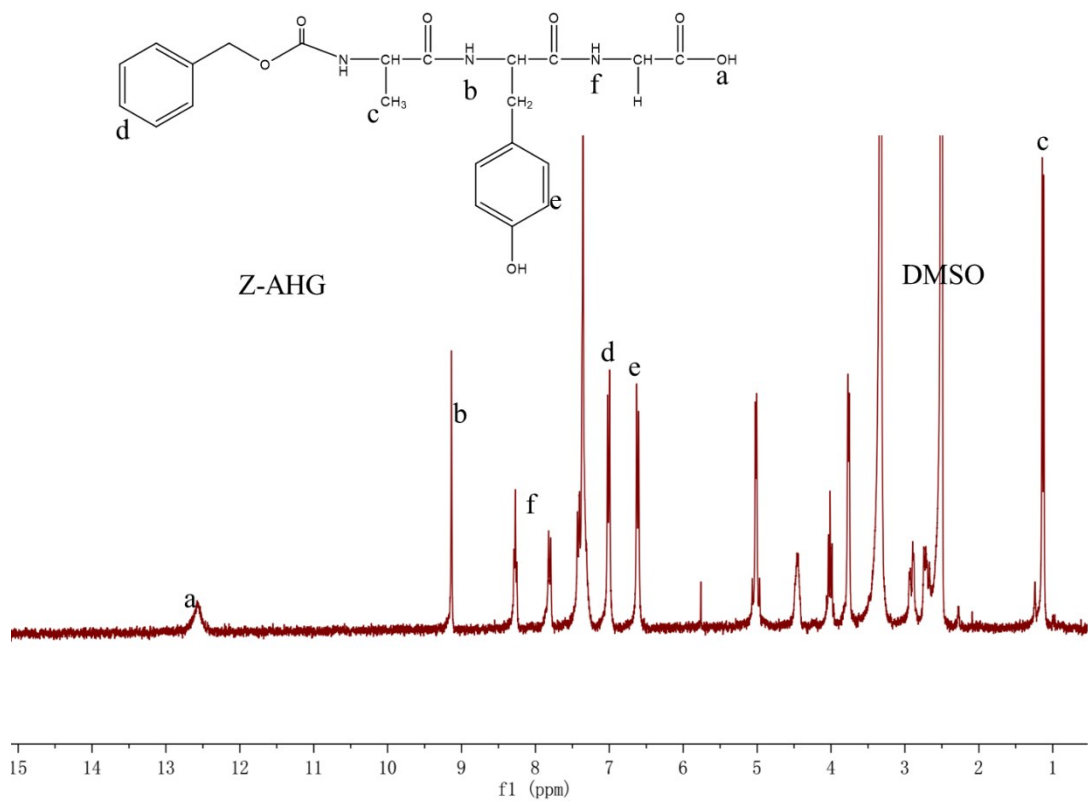

**Figure S2.** <sup>1</sup>H NMR spectrum of Ala-phe-gly(Z-AHG) in DMSO-*d*<sub>6</sub>.

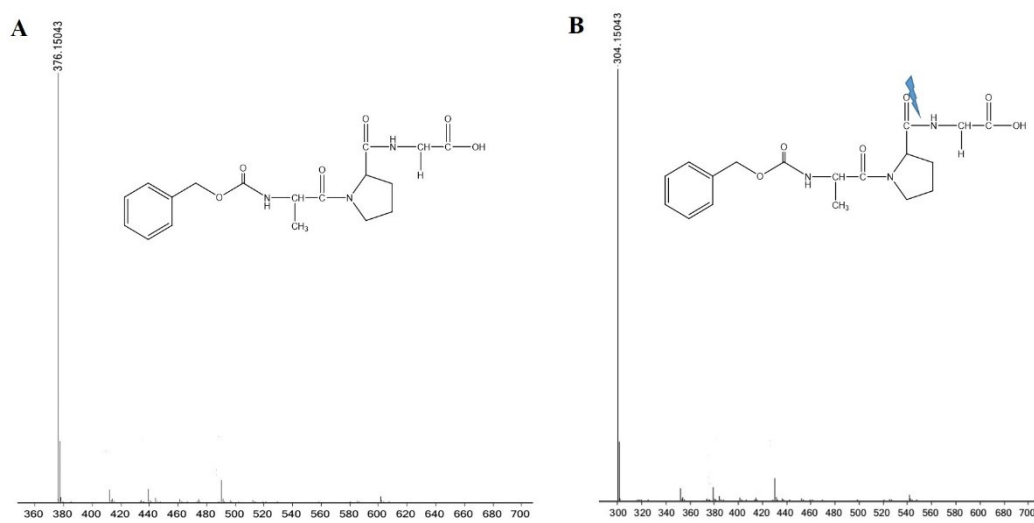

**Figure S3.** Cleavage of Z-Ala-phe-gly after incubating with FAP $\alpha$  for 4 h. (A) 0h; (B)



4h.

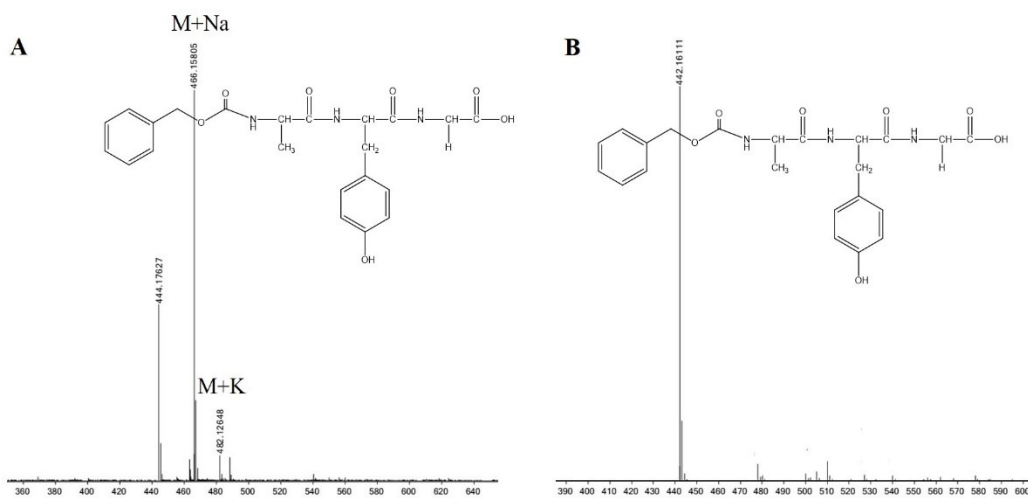

**Figure S4.** Cleavage of Z-Ala-phe-gly after incubating with FAP $\alpha$  for 4 h. (A) 0h; (B) 4h.

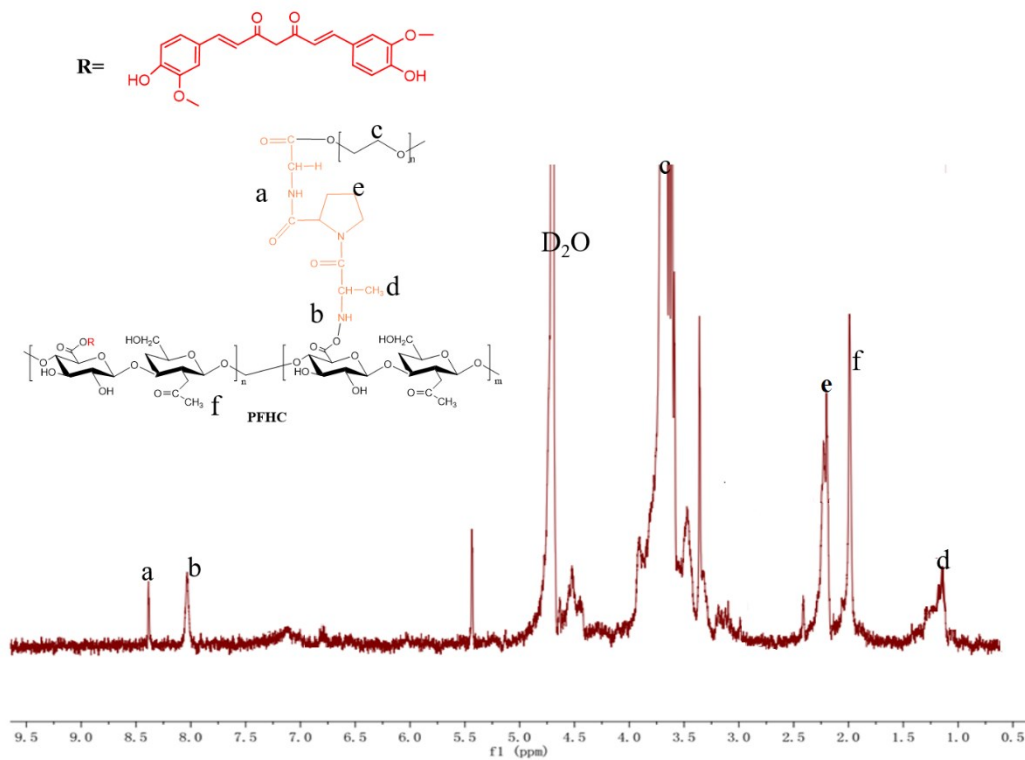

**Figure S5.**  $^1\text{H}$  NMR spectrum of PFHC in  $\text{D}_2\text{O}$ .

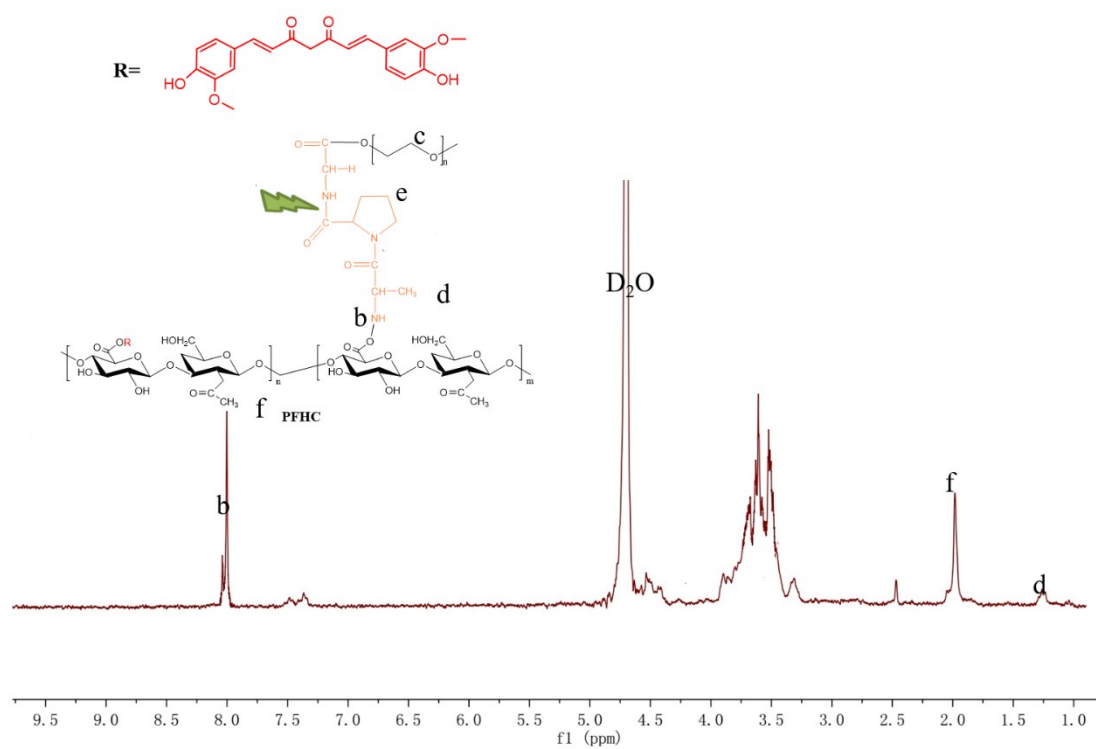

**Figure S6.** <sup>1</sup>H NMR spectrum of PFHC in D<sub>2</sub>O after incubating with FAPα for 4 h.

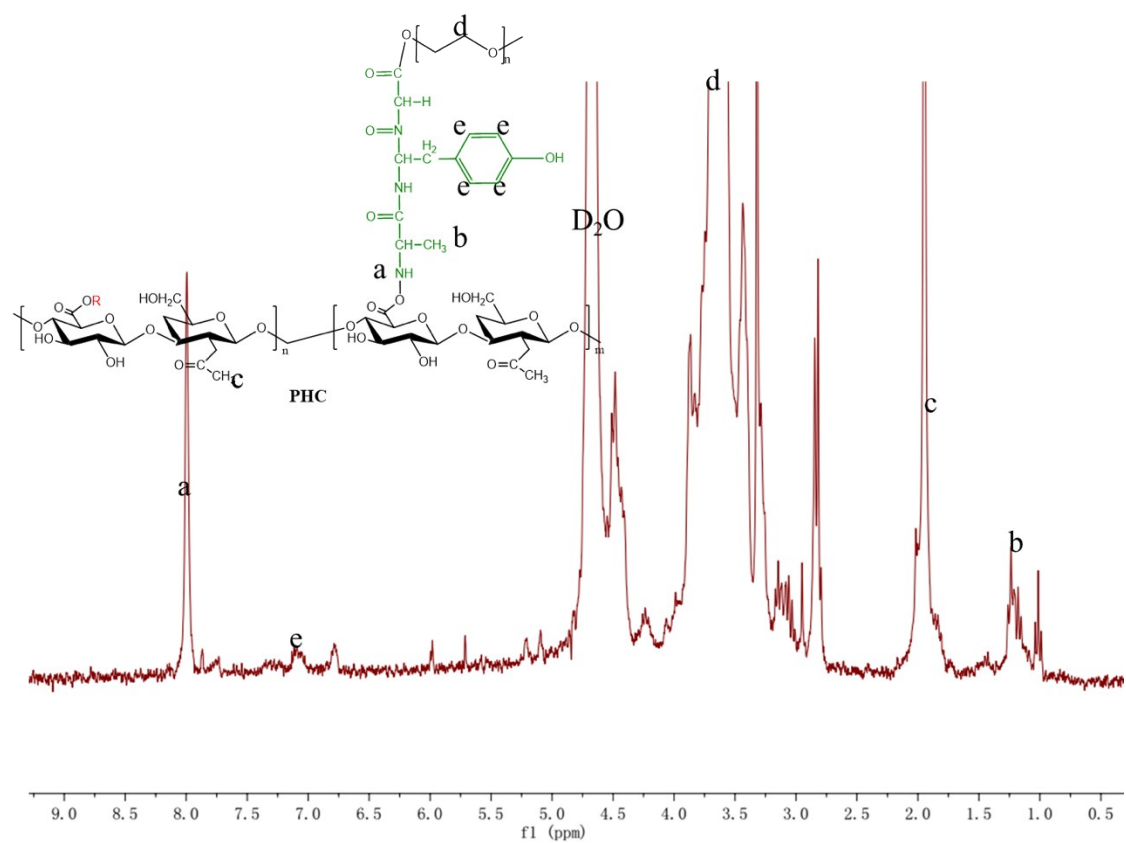

**Figure S7.** <sup>1</sup>H NMR spectrum of PHC in D<sub>2</sub>O after incubating with FAP $\alpha$  for 4 h.

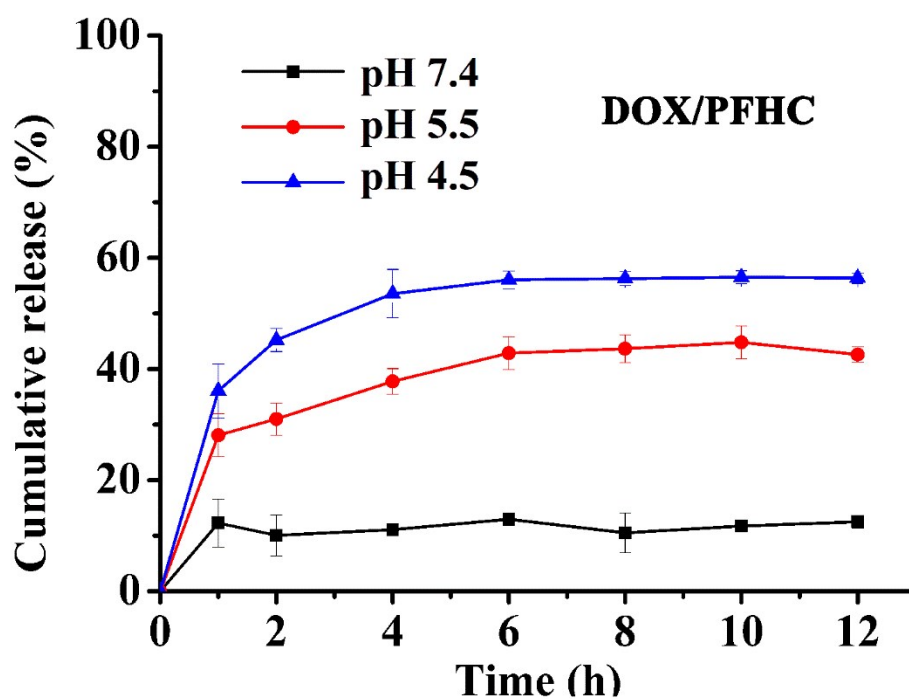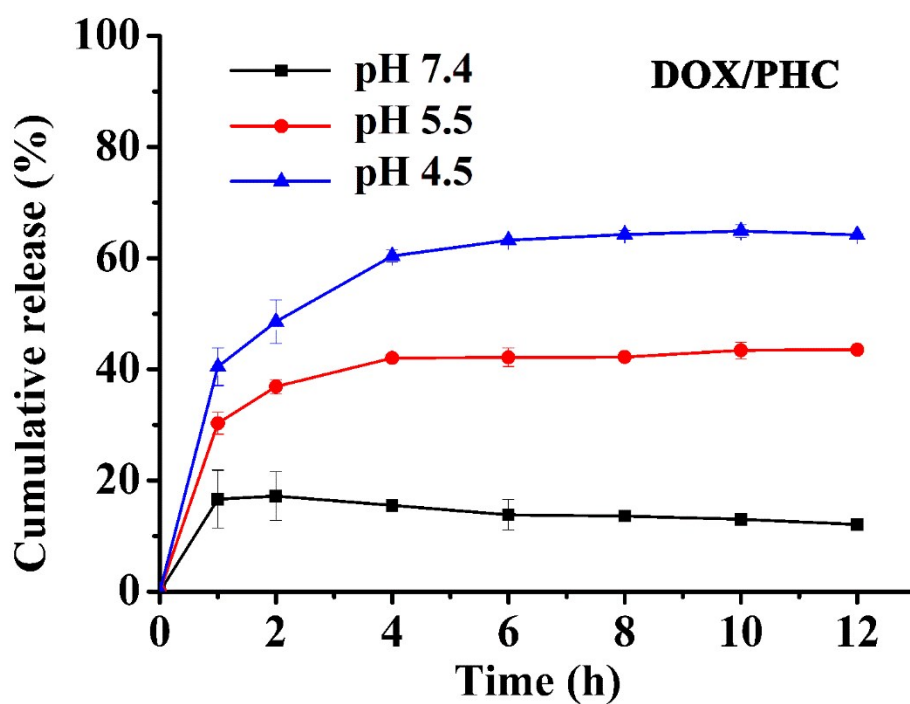

**Figure S8.** *In vitro* DOX release profiles of DOX/PFHC and DOX/PHC NPs in different conditions. Data are presented as mean  $\pm$  SD (n = 3).

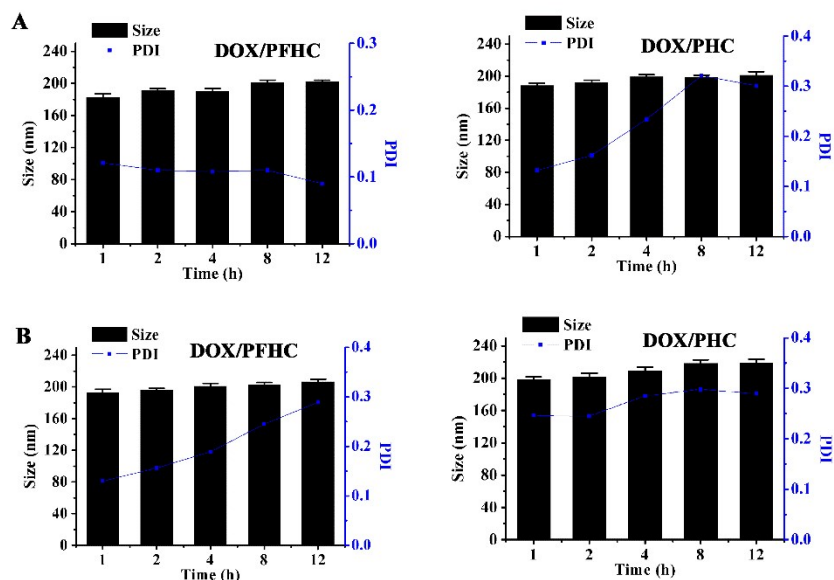

**Figure S9.** The stability of nanoparticle formulations in 10 % plasma (A) and DMEM with 10% FBS(B) (Data are presented as mean  $\pm$  SD (n = 3)).

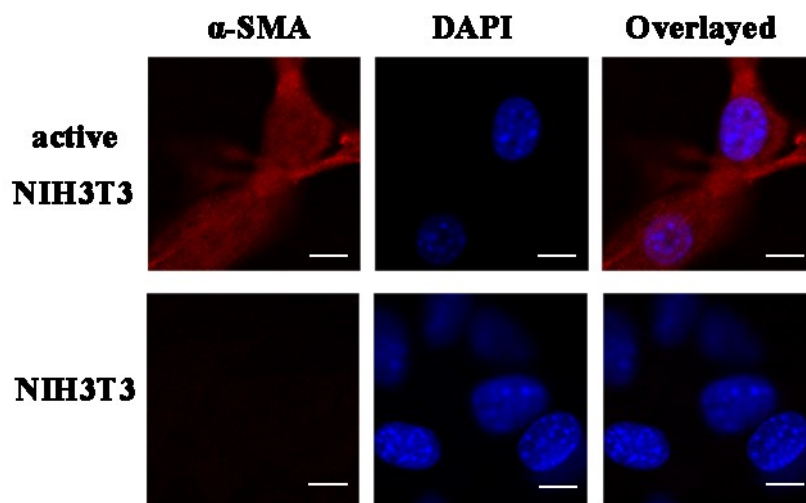

**Figure S10.** The relative expressing levels of  $\alpha$ -SMA in different cell lines with CLSM (bar=20  $\mu$ m).

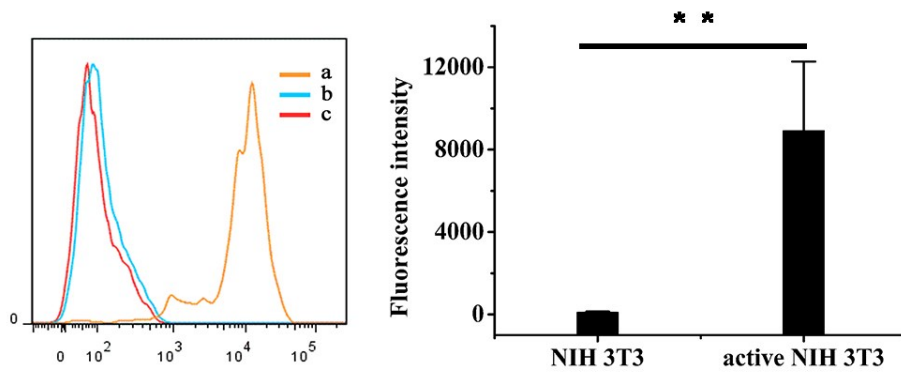

**Figure S11.** The relative expressing levels of FAP- $\alpha$  in in different cell lines with flow cytometry (a: active NIH3T3, b: NIH3T3 c: control).

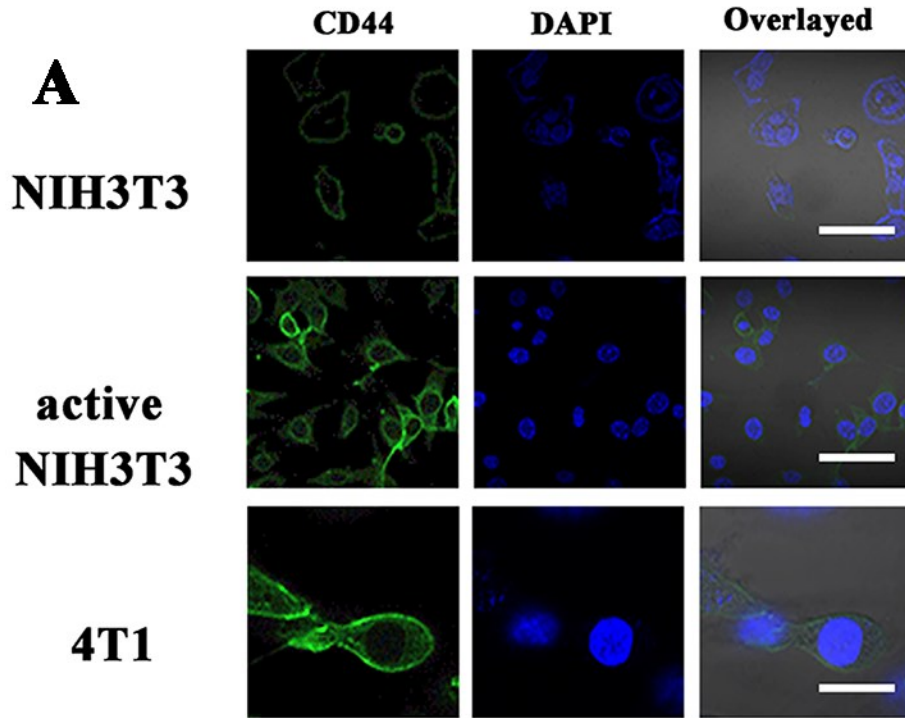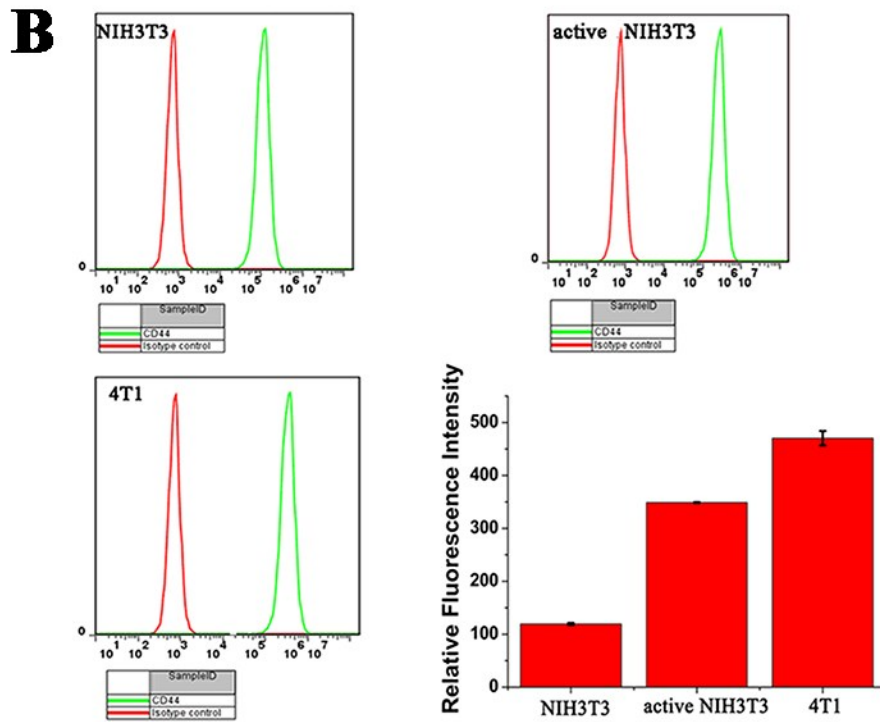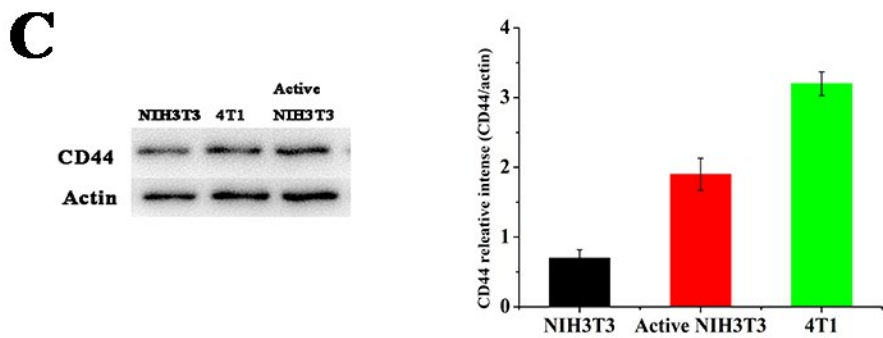

**Figure S12.** The relative expressing levels of CD44 receptors in different cell lines. (A) Immunofluorescence staining analysis of CD44 receptors expression with CLSM (bar=100  $\mu$ m). (B) Analysis of CD44 receptors expression with flow cytometry. (C) Analysis of CD44 receptors expression with WB.

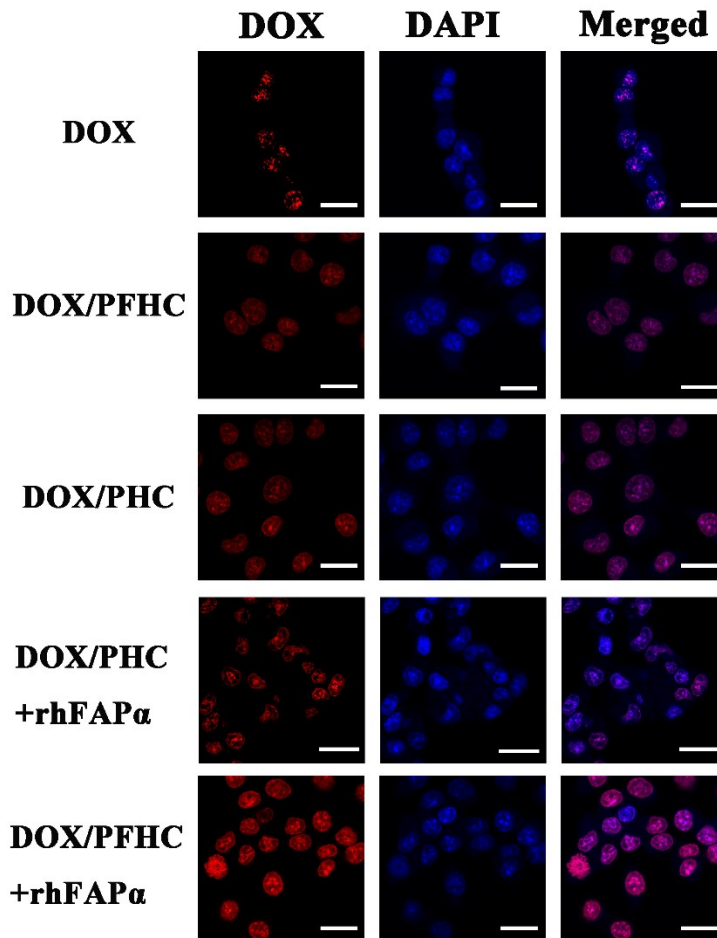

**Figure S13.** Representative CLSM images of 4T1 cell lines following 2 h incubation with different formulations (DOX dosage: 5.0  $\mu$ g/mL, bar=50  $\mu$ m).



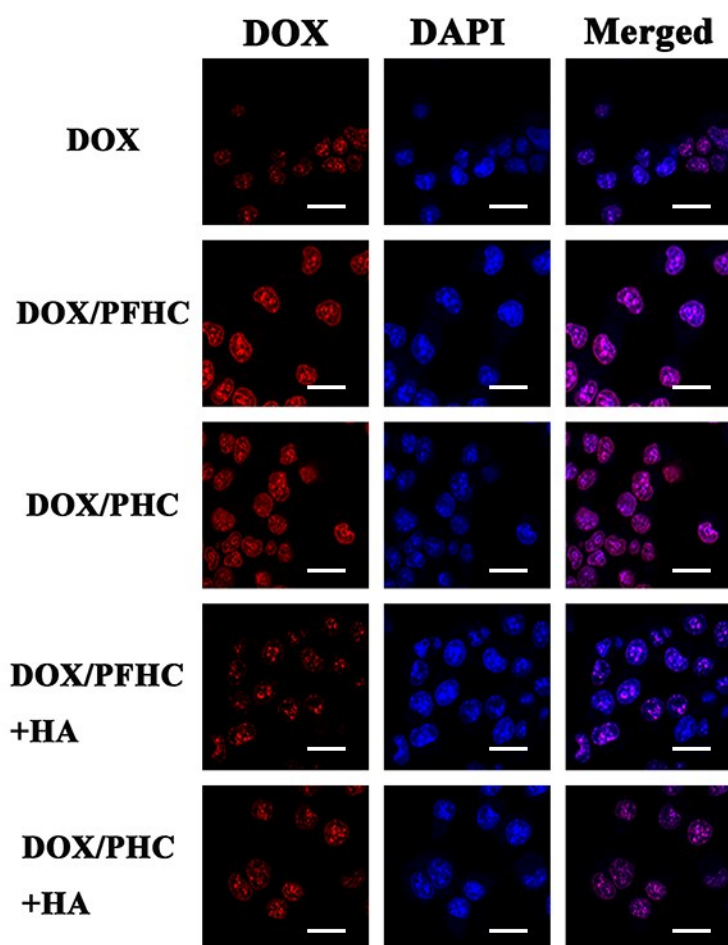

**Figure S14.** Representative CLSM images of active NIH3T3 cell lines following 2 h incubation with different formulations (DOX dosage: 5.0  $\mu\text{g/mL}$ , bar=50  $\mu\text{m}$ ).

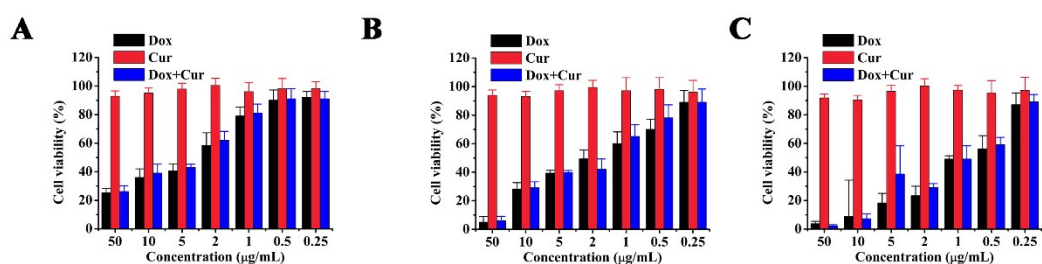

**Figure S15.** The cytotoxicity of Dox+Cur against different cell lines for 24h. (A)NIH3T3, (B) 4T1, (C) active NIH3T3 cells (mean  $\pm$  SD,  $n = 3$ )(The concentration of free Cur was equal to that in DOX-loading nanoparticles with same DOX dosage).

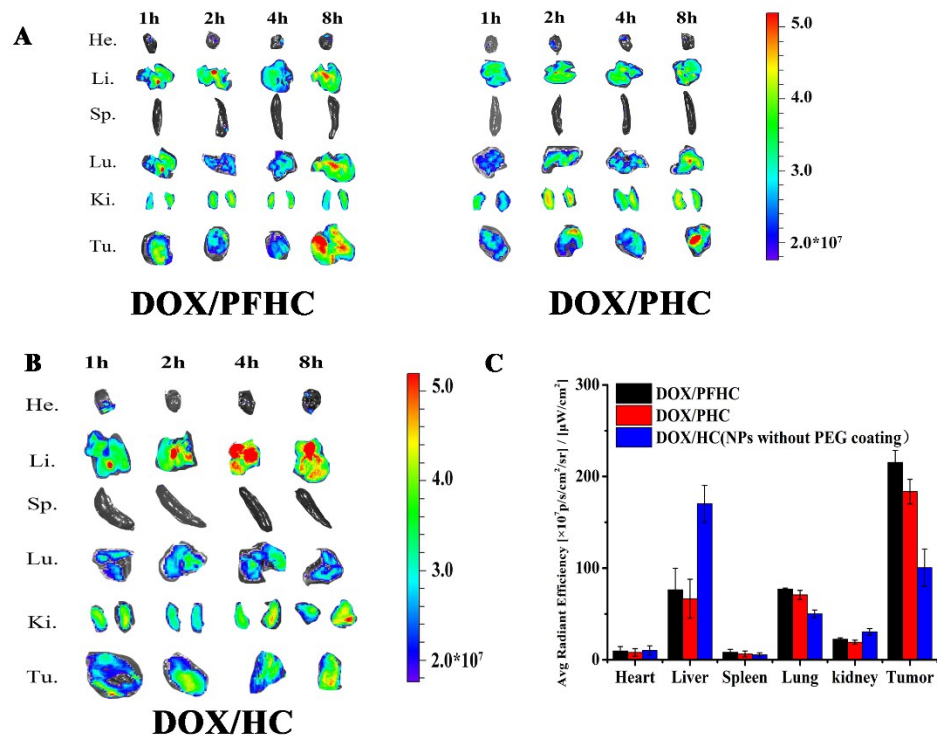

**Figure S16.** (A-B) Ex vivo Dox fluorescence images of the major organs and tumor harvested from the 4T1-NIH3T3 bearing mice following different times intravenous injection of NPs (DOX:5mg/kg). (C) Quantitative analysis of relative organ and tumor accumulation at 8 h (\* $P \leq 0.05$ , indicates  $\pm$  SD,  $n = 3$ ).

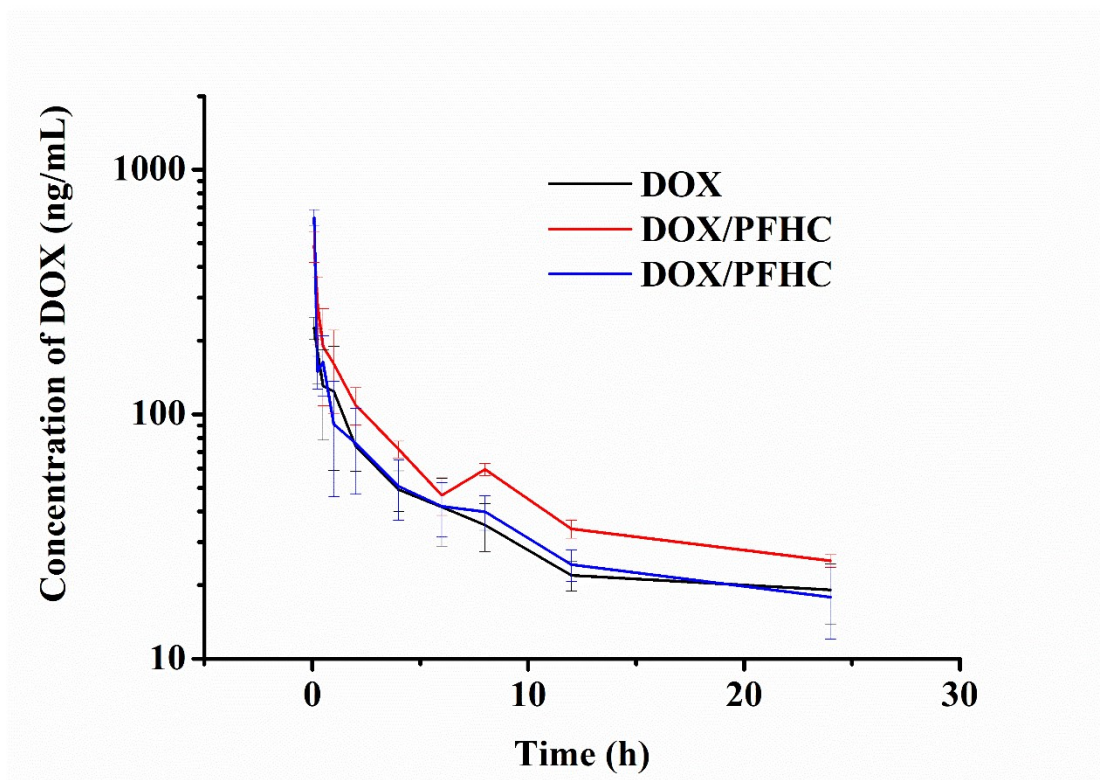

**Figure S17.** Plasma concentration-time curves of DOX in rats after intravenous administration with different DOX formulations at a dose of 5 mg/kg DOX (n = 3, mean  $\pm$  SD) .

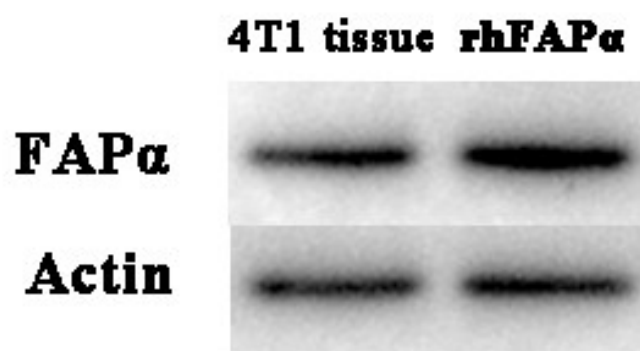

**Figure S18.** Expression of FAP $\alpha$  by western blot in 4T1 tumor tissues (30 $\mu$ g of rhFAP $\alpha$  used as control).

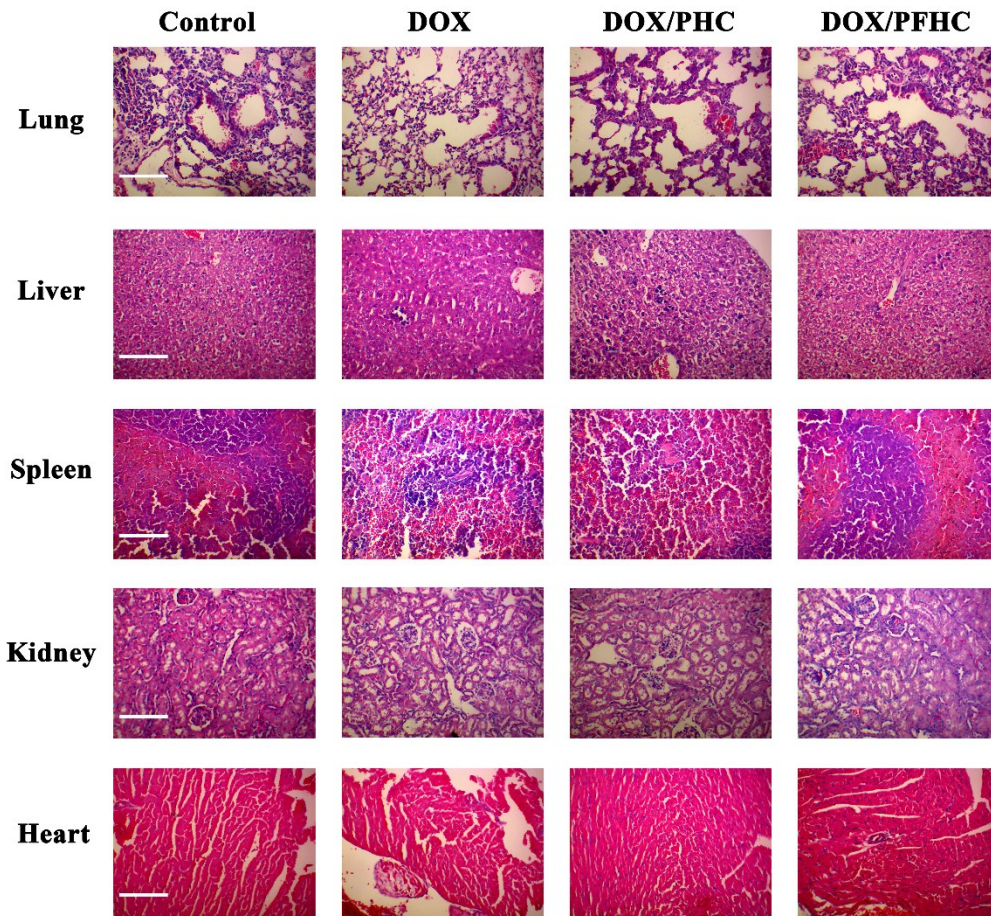

**Figure S19.** H&E staining of major organs after the last treatment (bar= 50  $\mu$ m).

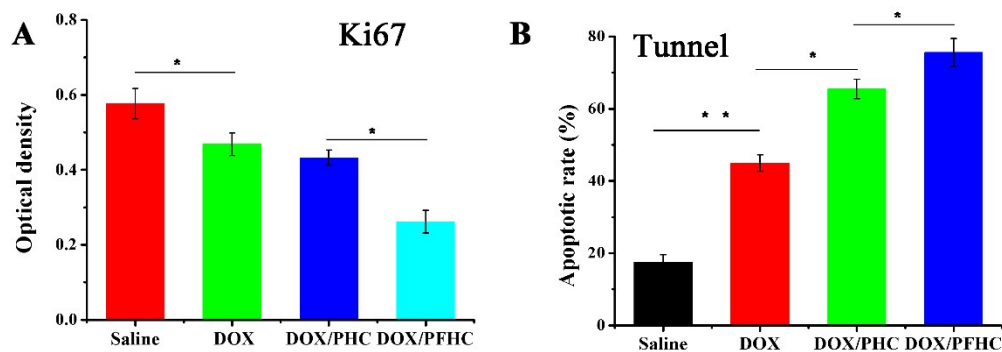

**Figure S20.** Morphological evaluations of tumor sites. (A) In situ cell death detection of tumor tissue (TUNEL);(B) *In vivo* evaluation of tumor proliferation level by Ki-67 immunohistochemistry (\* $P \leq 0.05$ , \*\* $P \leq 0.01$ , indicates  $\pm$  SD, n = 3).



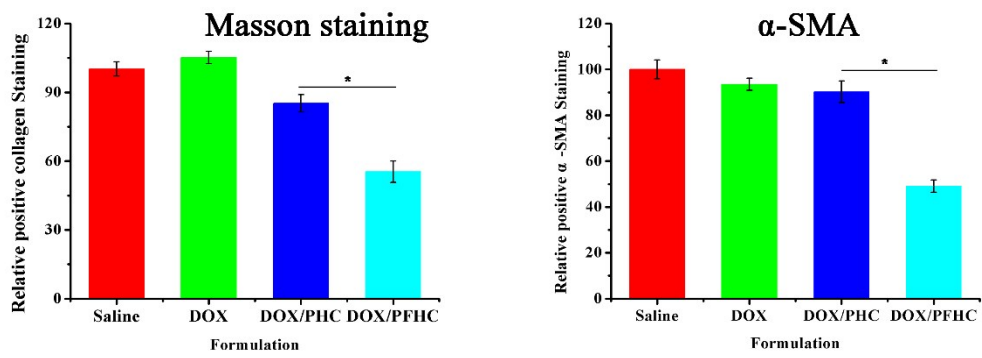

**Figure S21.** Semi-quantitative analysis of Masson staining and  $\alpha$ -SMA by immunofluorescent staining (\* $P \leq 0.05$ , indicates  $\pm$  SD,  $n = 3$ ).

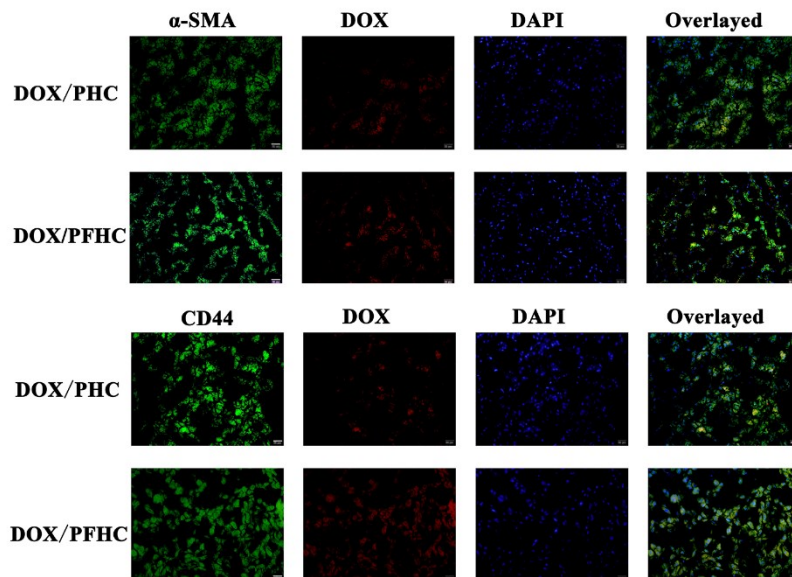

**Figure S22.** Micro-distribution of NPs in tumor mass after last treatment. (bar=20  $\mu$ m)

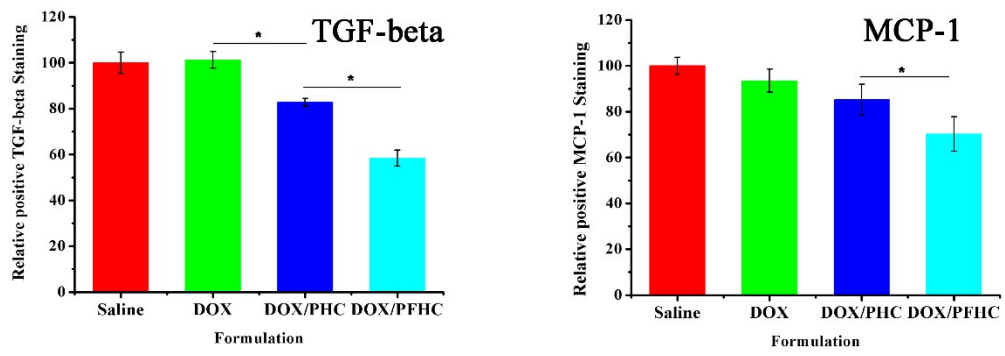

**Figure S23.** Semi-quantitative analysis of TGF-beta and MCP-1 by immunofluorescent staining (\* $P \leq 0.05$ , indicates  $\pm$  SD,  $n = 3$ ).

**Table S1.** Characterizations of the micelles. (indicates  $\pm$  SD, n = 3)

| <b>Name</b> | <b>Size(nm)</b> | <b>PDI</b>       | <b>Zeta potential</b><br><b>(mv)</b> | <b>DL</b><br><b>(%)</b> | <b>EE</b><br><b>(%)</b> |
|-------------|-----------------|------------------|--------------------------------------|-------------------------|-------------------------|
| DOX/PHC     | 178.1 $\pm$ 2.5 | 0.202 $\pm$ 0.08 | 0                                    | 9.8 $\pm$ 0.15          | 98 $\pm$ 0.23           |
| DOX/PFHC    | 167.3 $\pm$ 1.3 | 0.12 $\pm$ 0.02  | -3.2 $\pm$ 0.3                       | 9.9 $\pm$ 0.13          | 95 $\pm$ 0.21           |

**Table S2.** Pharmacokinetic parameters of Dox and DOX-loading NPs in mice after a single intravenous administration at the dose of 5 mg/kg ( $n = 3$ ).

| Parameter            | Units  | DOX            | DOX/PHC            | DOX/PFHC       |
|----------------------|--------|----------------|--------------------|----------------|
| AUC <sub>(0-t)</sub> | µg/L*h | 1118.44±103.51 | 1184.44±367.6<br>5 | 1358.33±132.92 |
| t <sub>1/2</sub>     | h      | 4.47±1.13      | 13.6±4.01          | 13.92±1.9      |
